# Supplementary material for: In silico method for identifying the key residues in a knotted protein: with MJ0366 as an example
Source: Royal Society of Chemistry journal article supplement (doi:10.1039/d2cp03589h), 2022-01-01
Supplement: d2cp03589h1.pdf [file d2cp03589h1.pdf]

## Supplemental Materials

### Contents:

**Figure S1:** The values of the radius of gyration at different temperatures in the coarse-grained “Go”-like model.

**Figure S2:** The correlation coefficients between the torsional angles and the “length of the knot tails” as a function of the time extension  $\Delta t$ .

**Figure S3:** The average correlation coefficients between the torsional angles and the “length of knot tails” as a function of the number of simulation replicas at different residues.

**Figure S4:** The average correlation coefficients of the virtual angles with “the length of knot tails” in the folding simulation with coarse-grained “Go”-like model.

**Figure S5:** The evolution curve of the “length of knot tails” at the unfolding point of the AMD simulation with coarse-grained “Go”-like model.

**Figure S6:** The evolutions of the virtual bond angle  $\kappa$  and virtual torsional angle  $\tau$  during the unfolding process in coarse-grained “Go”-like model.

**Figure S7:** The average correlation coefficients of the virtual angles with “the length of knot tails” in the unfolding simulation with coarse-grained “Go”-like model.

**Figure S8:** The evolution of RMSD in the unfolding simulation in all-atom model.

**Figure S9:** The evolution curve of the “length of knot tails” at the unfolding point of the AMD simulation with all-atom model.

**Figure S10:** The evolution of virtual bond angle  $\kappa$  and virtual torsional angle  $\tau$  during the unfolding process in all-atom model.

**Figure S11:** The average correlation coefficients of the virtual angles with “the length of knot tails” in the unfolding simulation with all-atom model.

**Figure S12:** Comparison on the rankings results of the residues between two different temperature settings in the AMD simulations

**Figure S13:** Comparison on the ranking results of the residues between two different simulation time settings in the AMD simulations

**Figure S14:** Comparison on the rankings of the residues with correlation coefficients calculated from Eq. 2 and Eq. 4.

**Figure S15:** The ROC curve of key residue for knotting according to the predictions from Eq. 4.

**Table S1:** The ranking of residues according to correlation coefficients between “length of knot tails” and virtual torsional angle  $\tau$  for knotting in coarse-grained “Go”-like model, unknotting in coarse-grained “Go”-like model and unknotting in all-atom model, respectively.

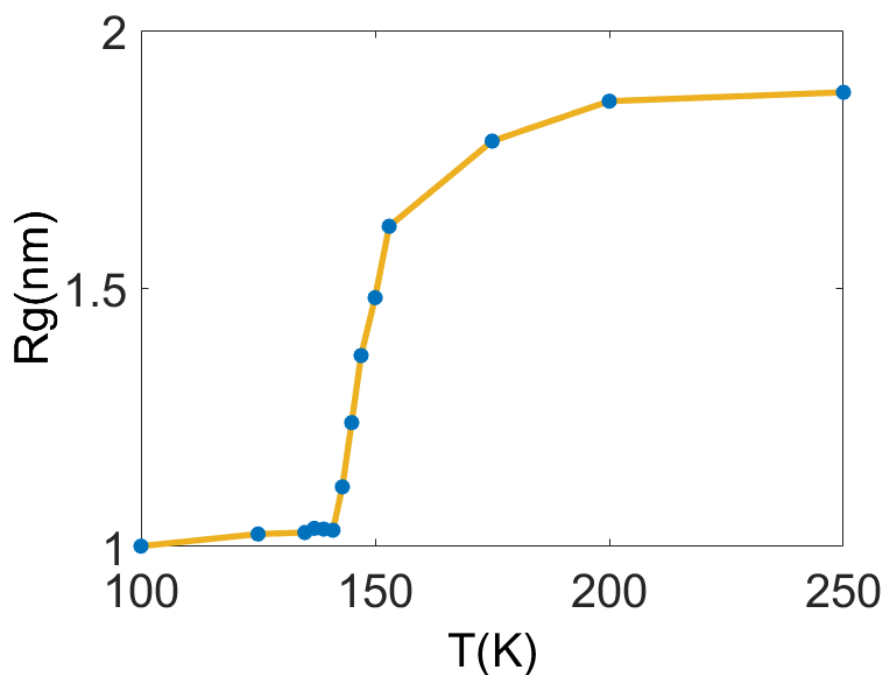

Figure S1: The average values of the radius of gyration at different temperatures in the coarse-grained “Go”-like model. The melting temperature  $T_m$  is labelled.

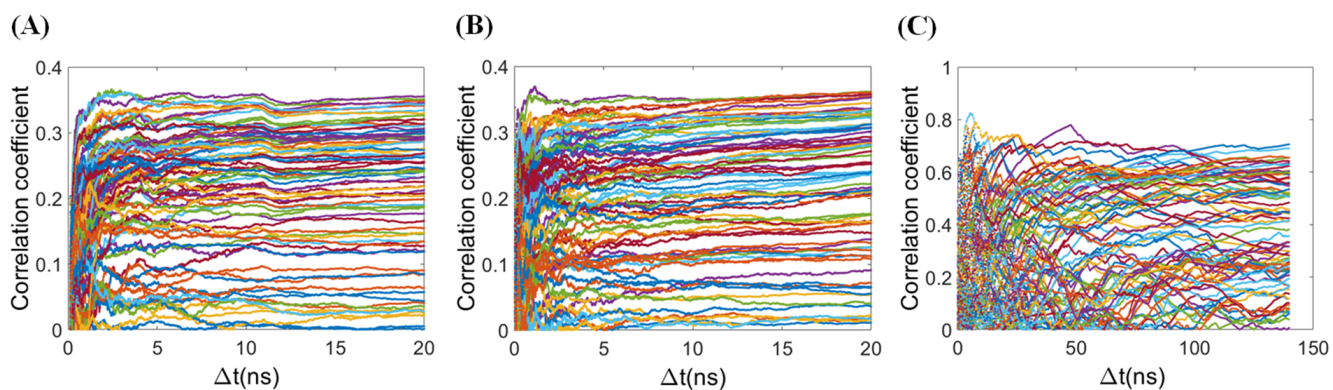

Figure S2: The correlation coefficients between the torsional angles and the “length of the knot tails” as a function of the time extension  $\Delta t$ . Panels (A), (B), (C) are for the cases of knotting in coarse-grained “Go”-like model, unknotting in coarse-grained “Go”-like model and unknotting in all-atom model, respectively. Each line in the figure represents the correlation coefficient at a residue in the protein.

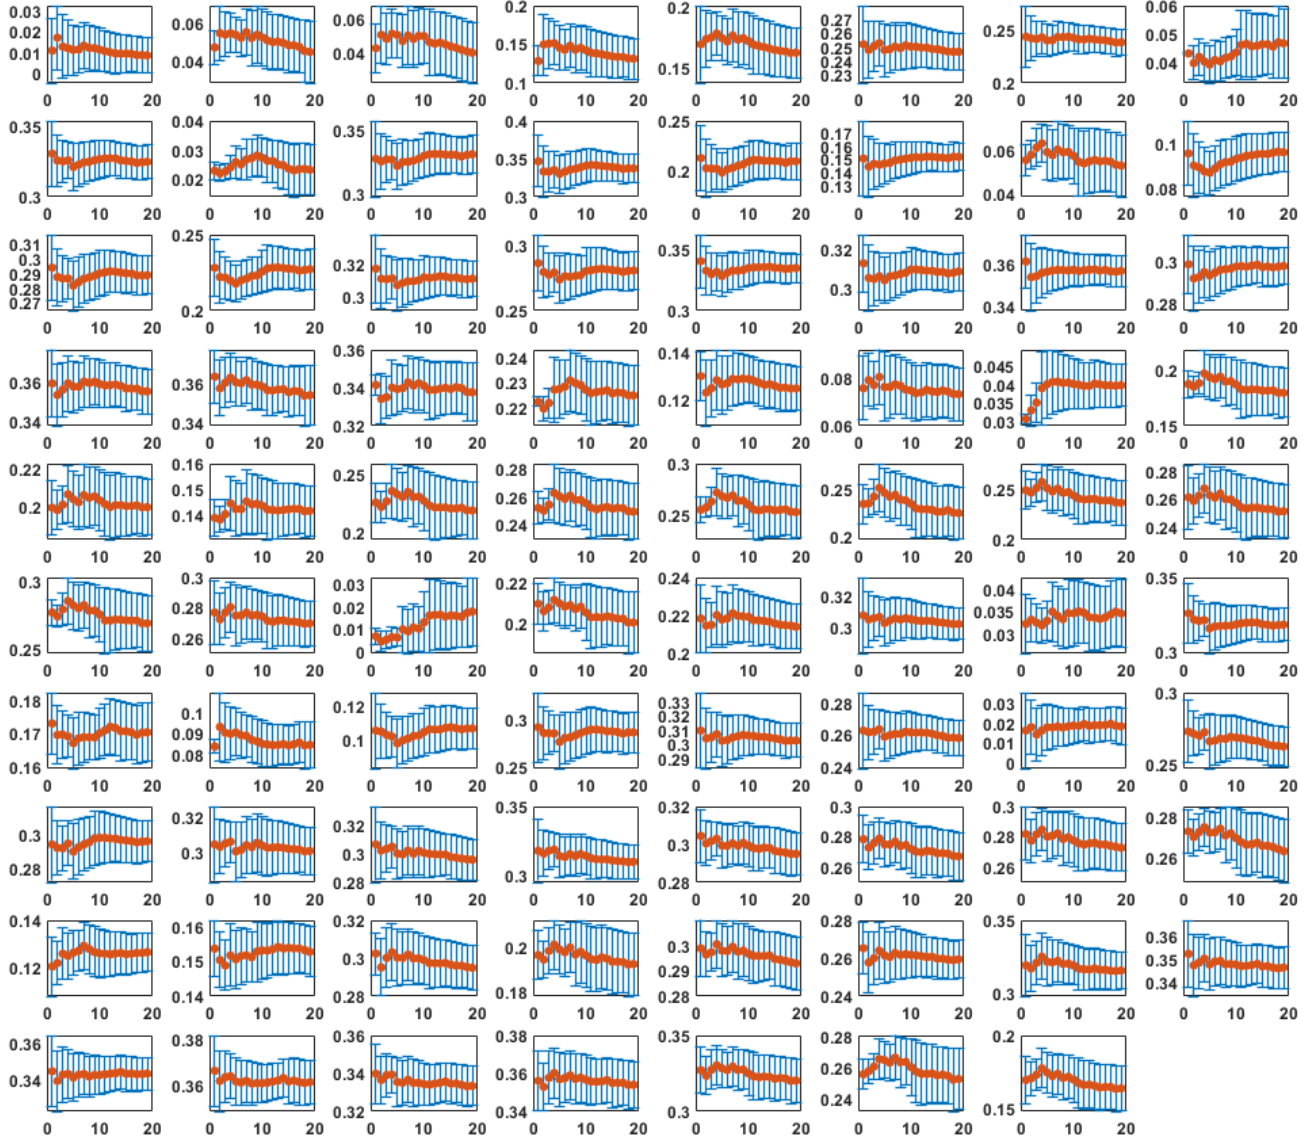

Figure S3: The average correlation coefficients between the torsional angles and the “length of knot tails” as a function of the number of simulation replicas at different residues. The red dots are the average values and the blue error bars denote the standard deviations. The x- and y-axis represents the number of replicas and the value of correlation coefficient, respectively. Each panel shows the correlation coefficients for a residue. The corresponding residue index for each panel (from 7 to 85) increases from left to right and top to bottom.

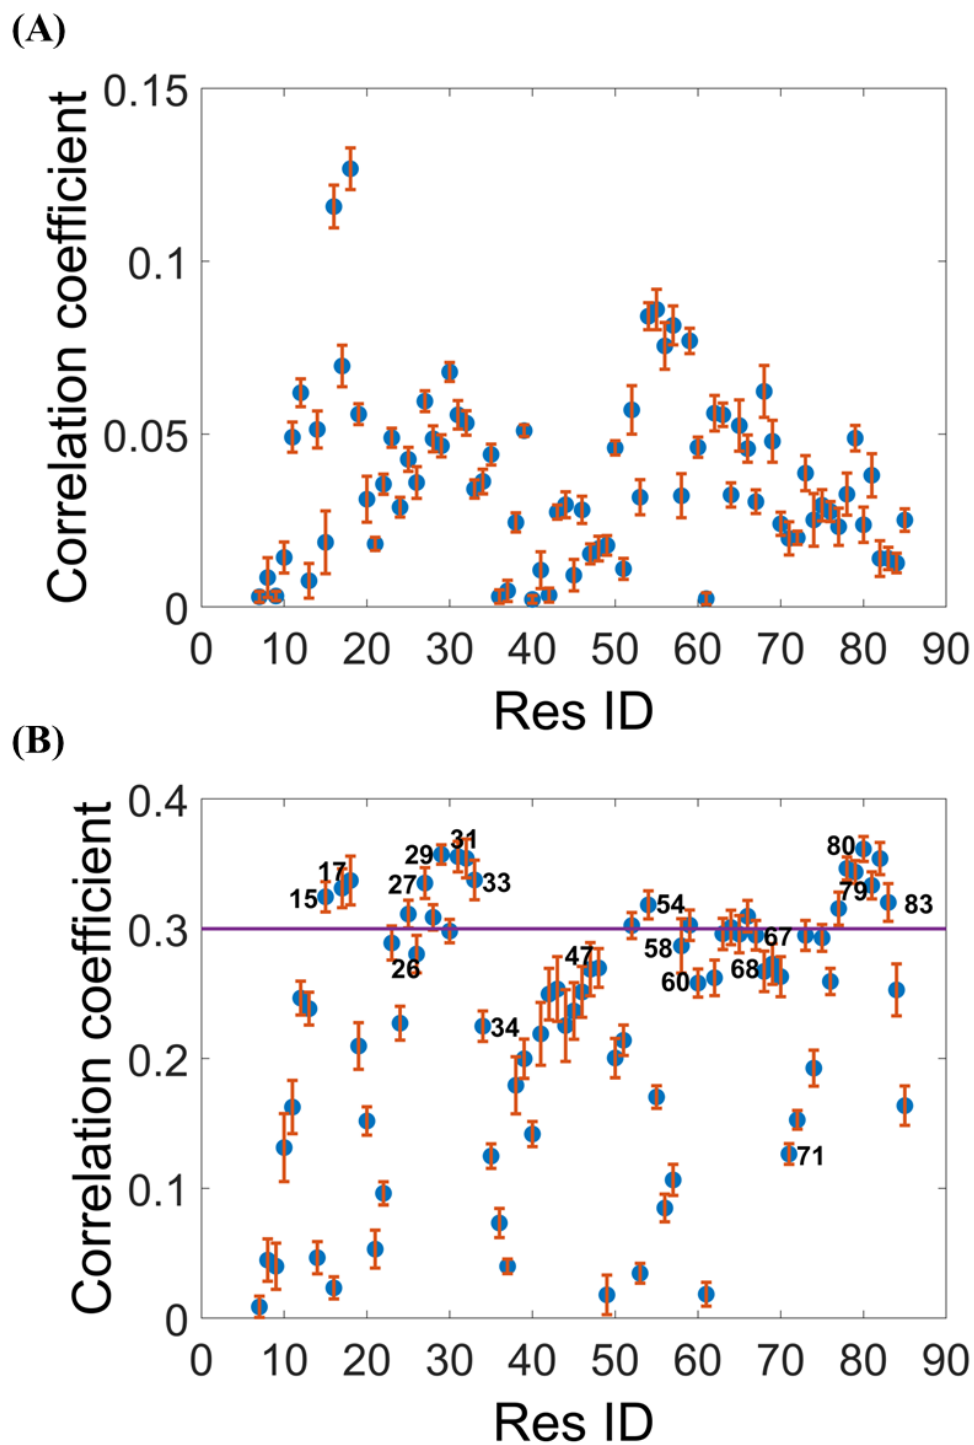

Figure S4: The average correlation coefficients of the virtual angles with “the length of knot tails” in the folding simulation with coarse-grained “Go”-like model. (A) The correlation coefficients between “length of knot tails” and  $\kappa$ . (B) The correlation coefficients between “length of knot tails” and  $\tau$ . The key residues verified by experiment are labeled in the figure. The blue dots are the average values and the red error bars denote the standard deviations.

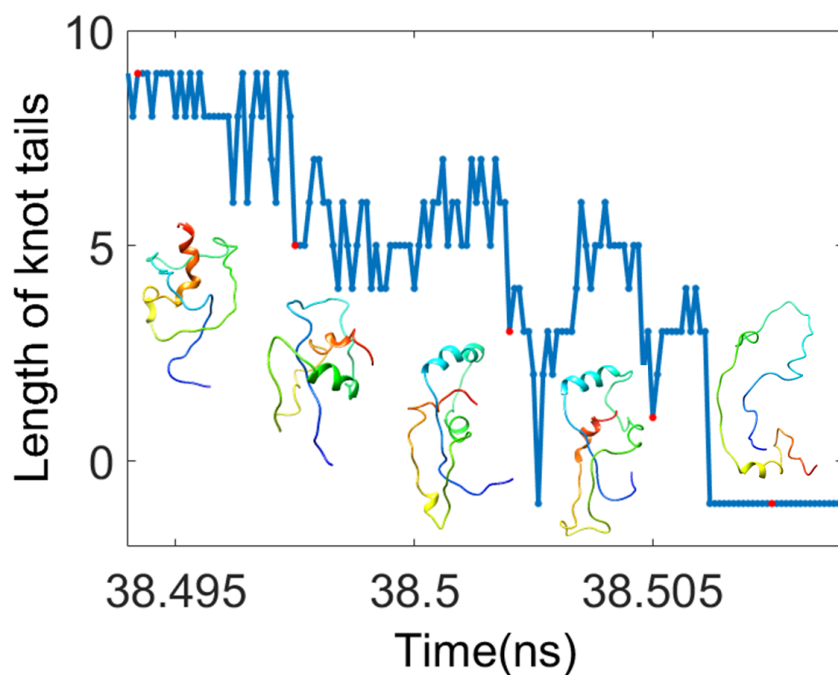

Figure S5: The evolution curve of the “length of knot tails” at the unfolding point of the AMD simulation with coarse-grained “Go”-like model. The snapshots corresponding to different “length of knot tails” (red points on the curve) are shown as insets.

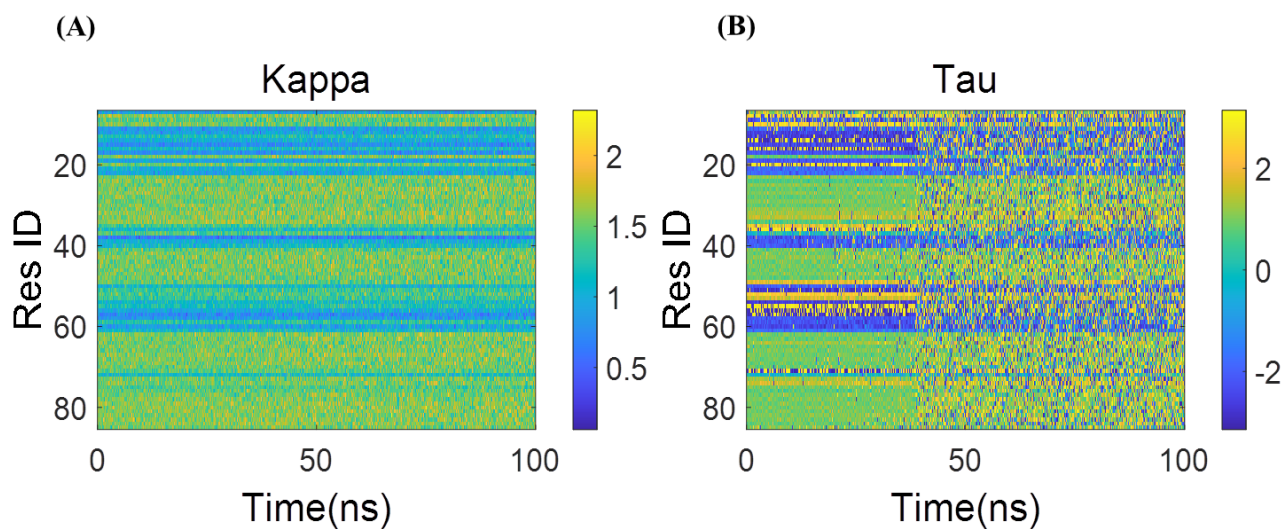

Figure S6: The evolutions of the virtual bond angle  $\kappa$  (Panel A) and virtual torsional angle  $\tau$  (Panel B) during the unfolding process in coarse-grained “Go”-like model.

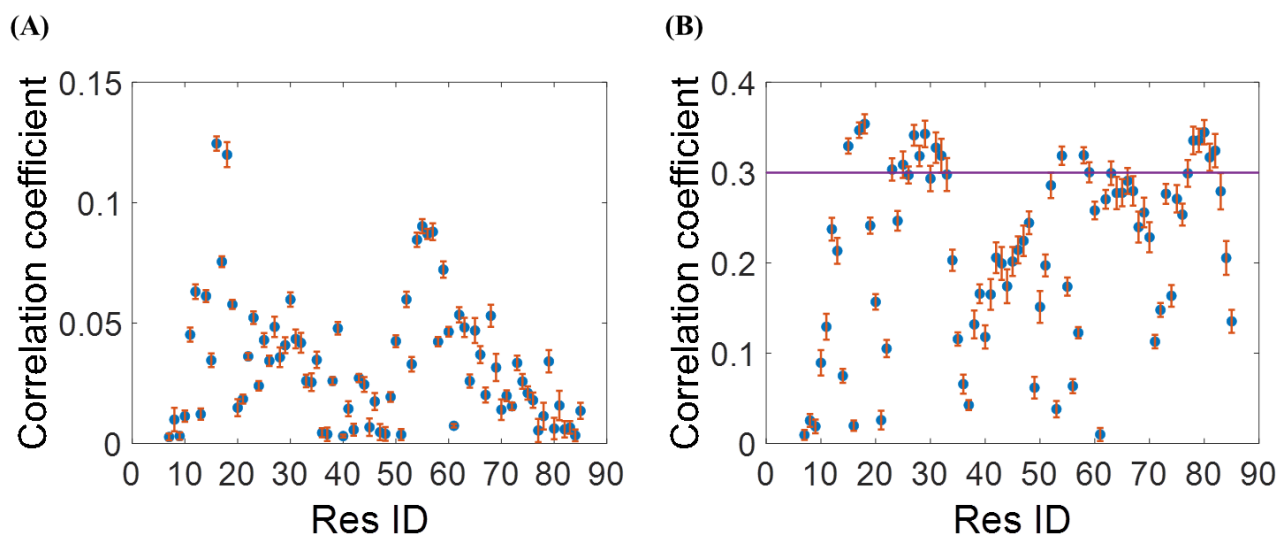

Figure S7: The average correlation coefficients of the virtual angles with “the length of knot tails” in the unfolding simulation with coarse-grained “Go”-like model. (A) The correlation coefficients between “length of knot tails” and  $\kappa$ . (B) The correlation coefficients between “length of knot tails” and  $\tau$ . The red dots are the average value and the blue error bars denote the standard deviations.

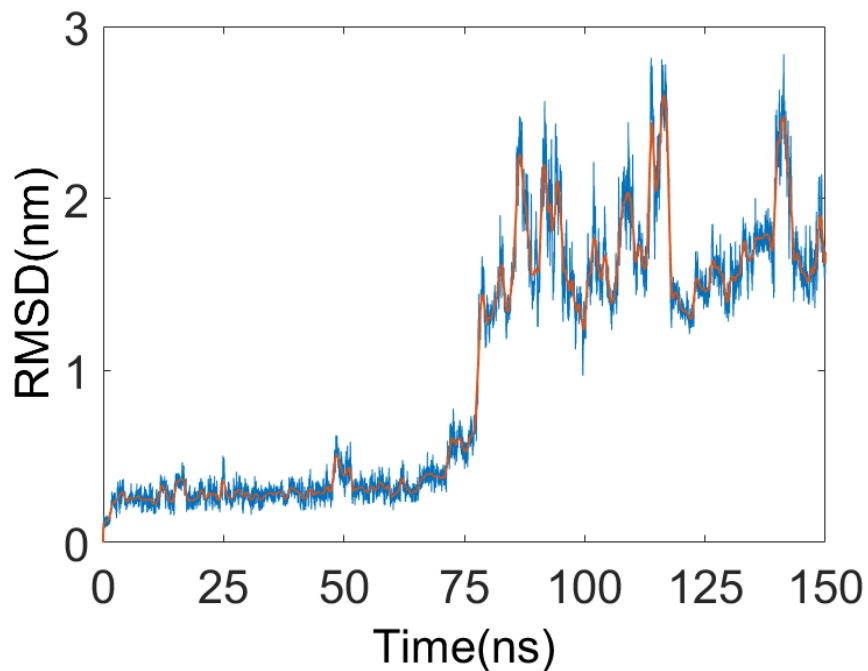

Figure S8: The evolution of RMSD in the unfolding simulation in all-atom model.



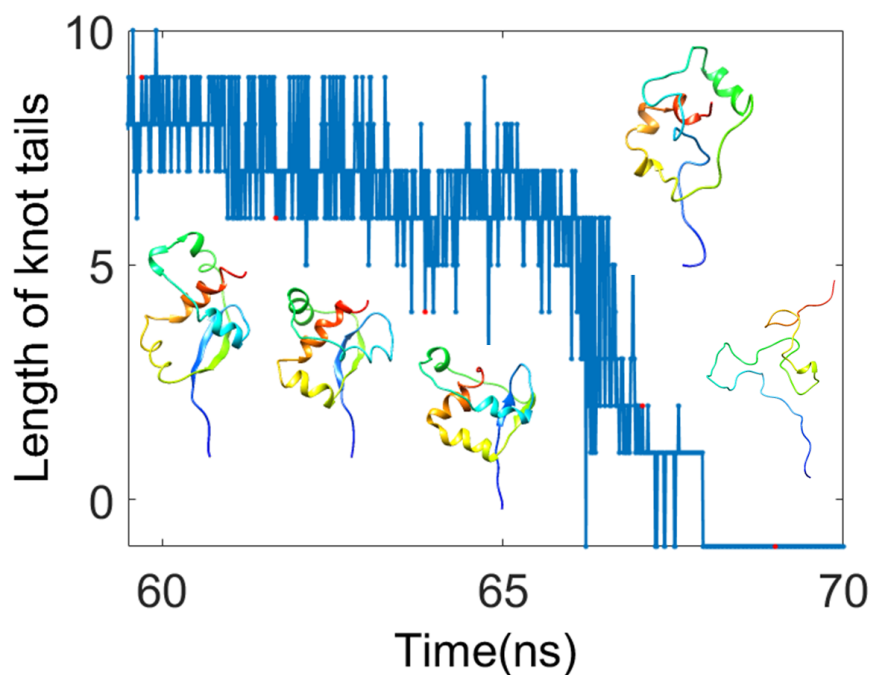

Figure S9: The evolution curve of the “length of knot tails” at the unfolding point of the AMD simulation with all-atom model. Some snapshots corresponding to different “length of knot tails” (red points on the curve) are shown as insets.

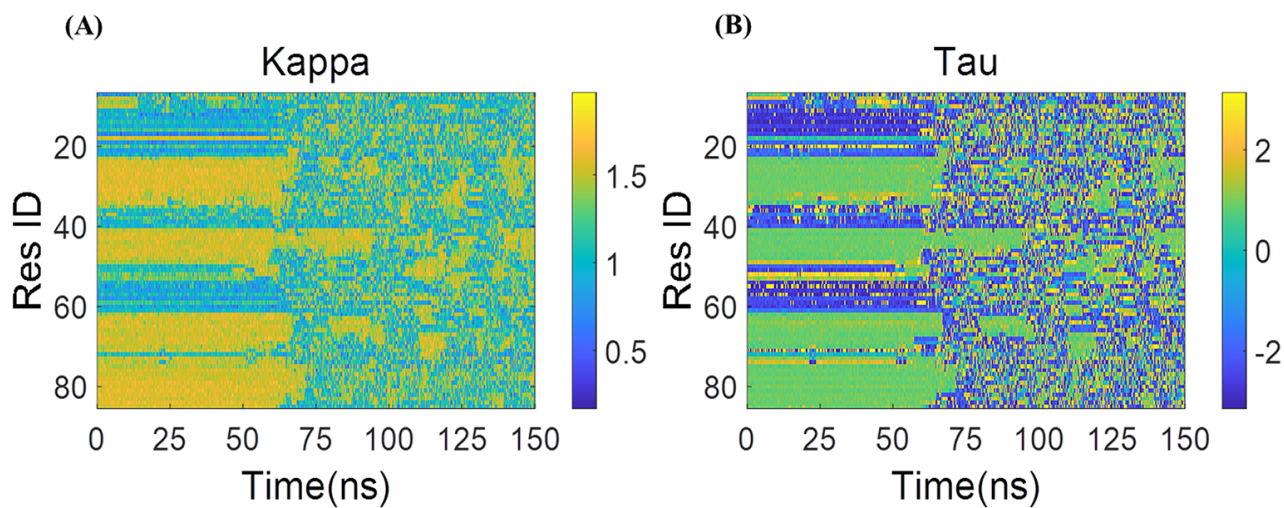

Figure S10: The evolution of virtual bond angle  $\kappa$  (panel A) and virtual torsional angle  $\tau$  (panel B) during the unfolding process in all-atom model.



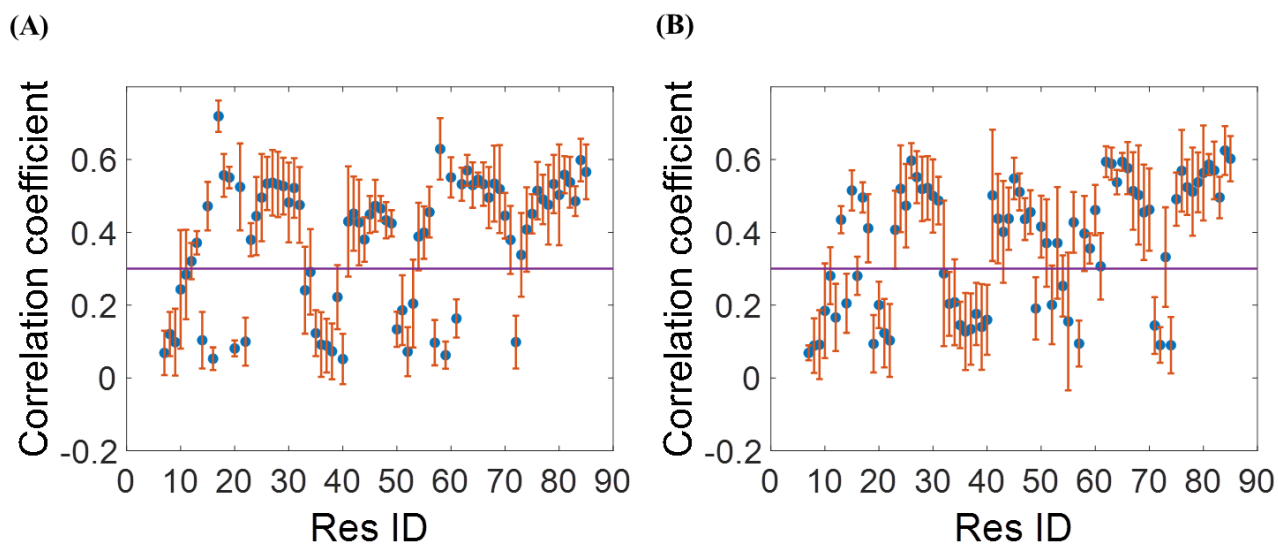

Figure S11: The average correlation coefficients of the virtual angles with “the length of knot tails” in the unfolding simulation with all-atom model. (A) The correlation coefficients between “length of knot tails” and  $\kappa$ . (B) The correlation coefficients between “length of knot tails” and  $\tau$ . The blue dots are the average value and the red error bars denote the standard deviations.

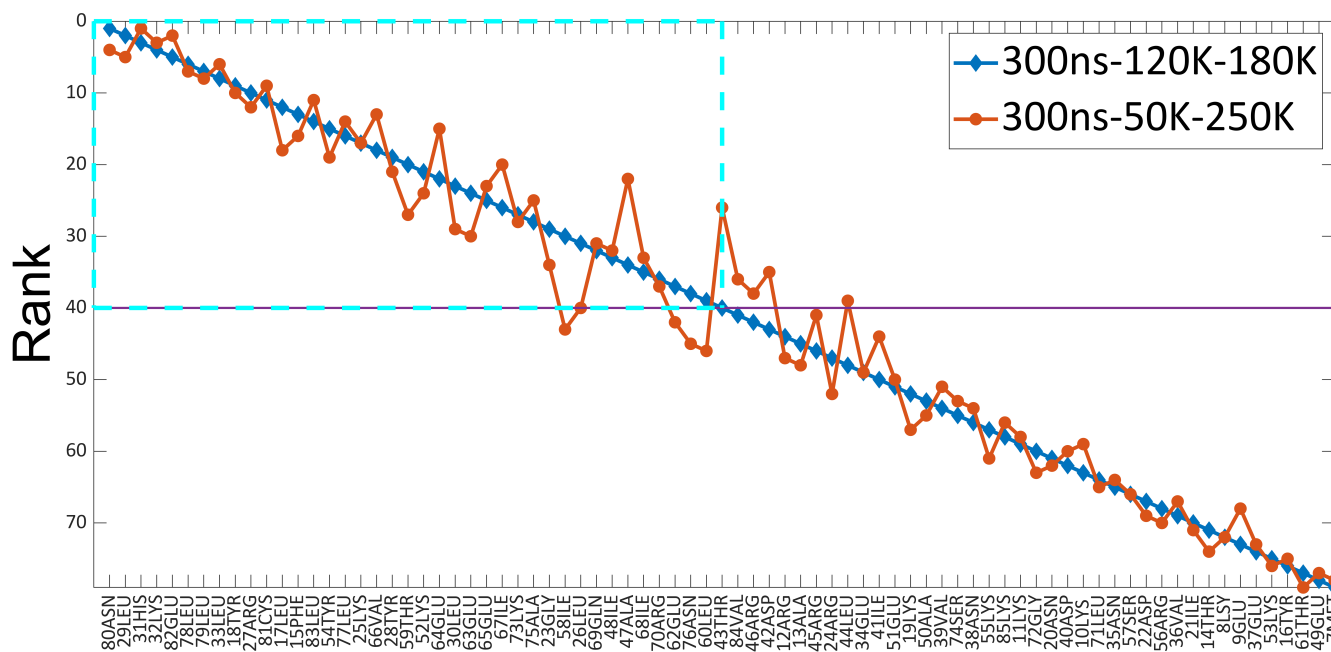

Figure S12: Comparison on the rankings results of the residues between two different temperature settings in the AMD simulations.

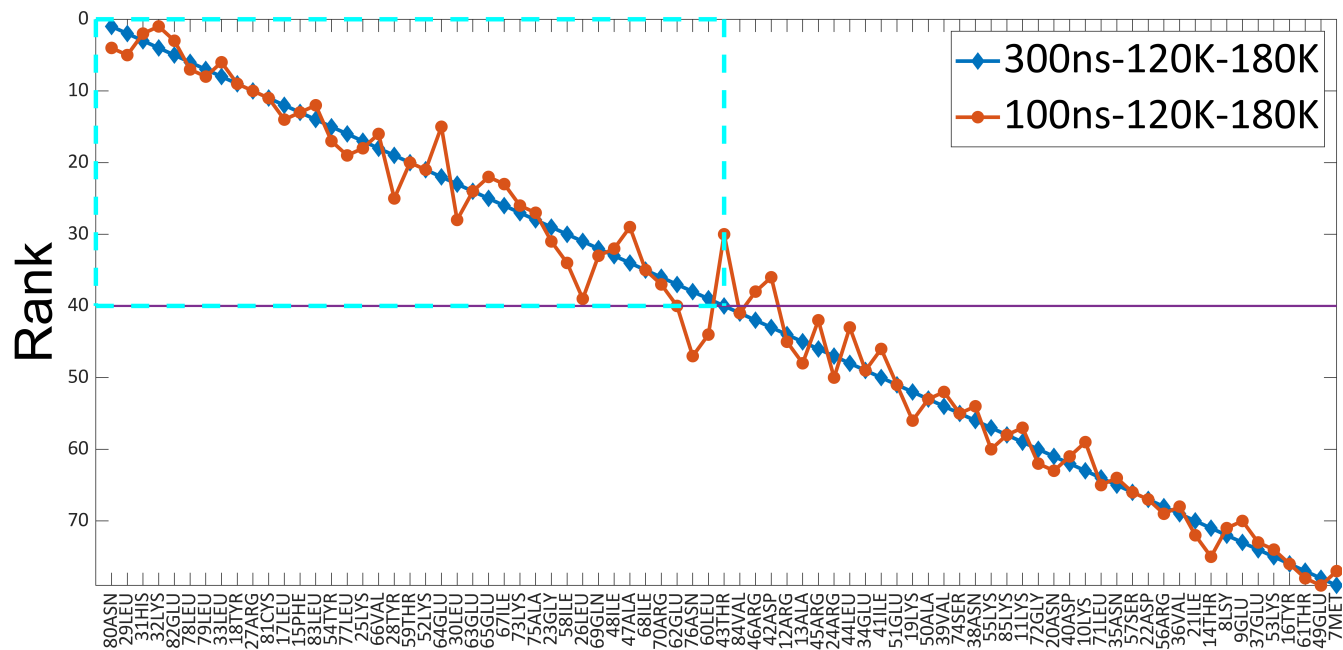

Figure S13: Comparison on the rankings results of the residues between two different time settings in the AMD simulations.

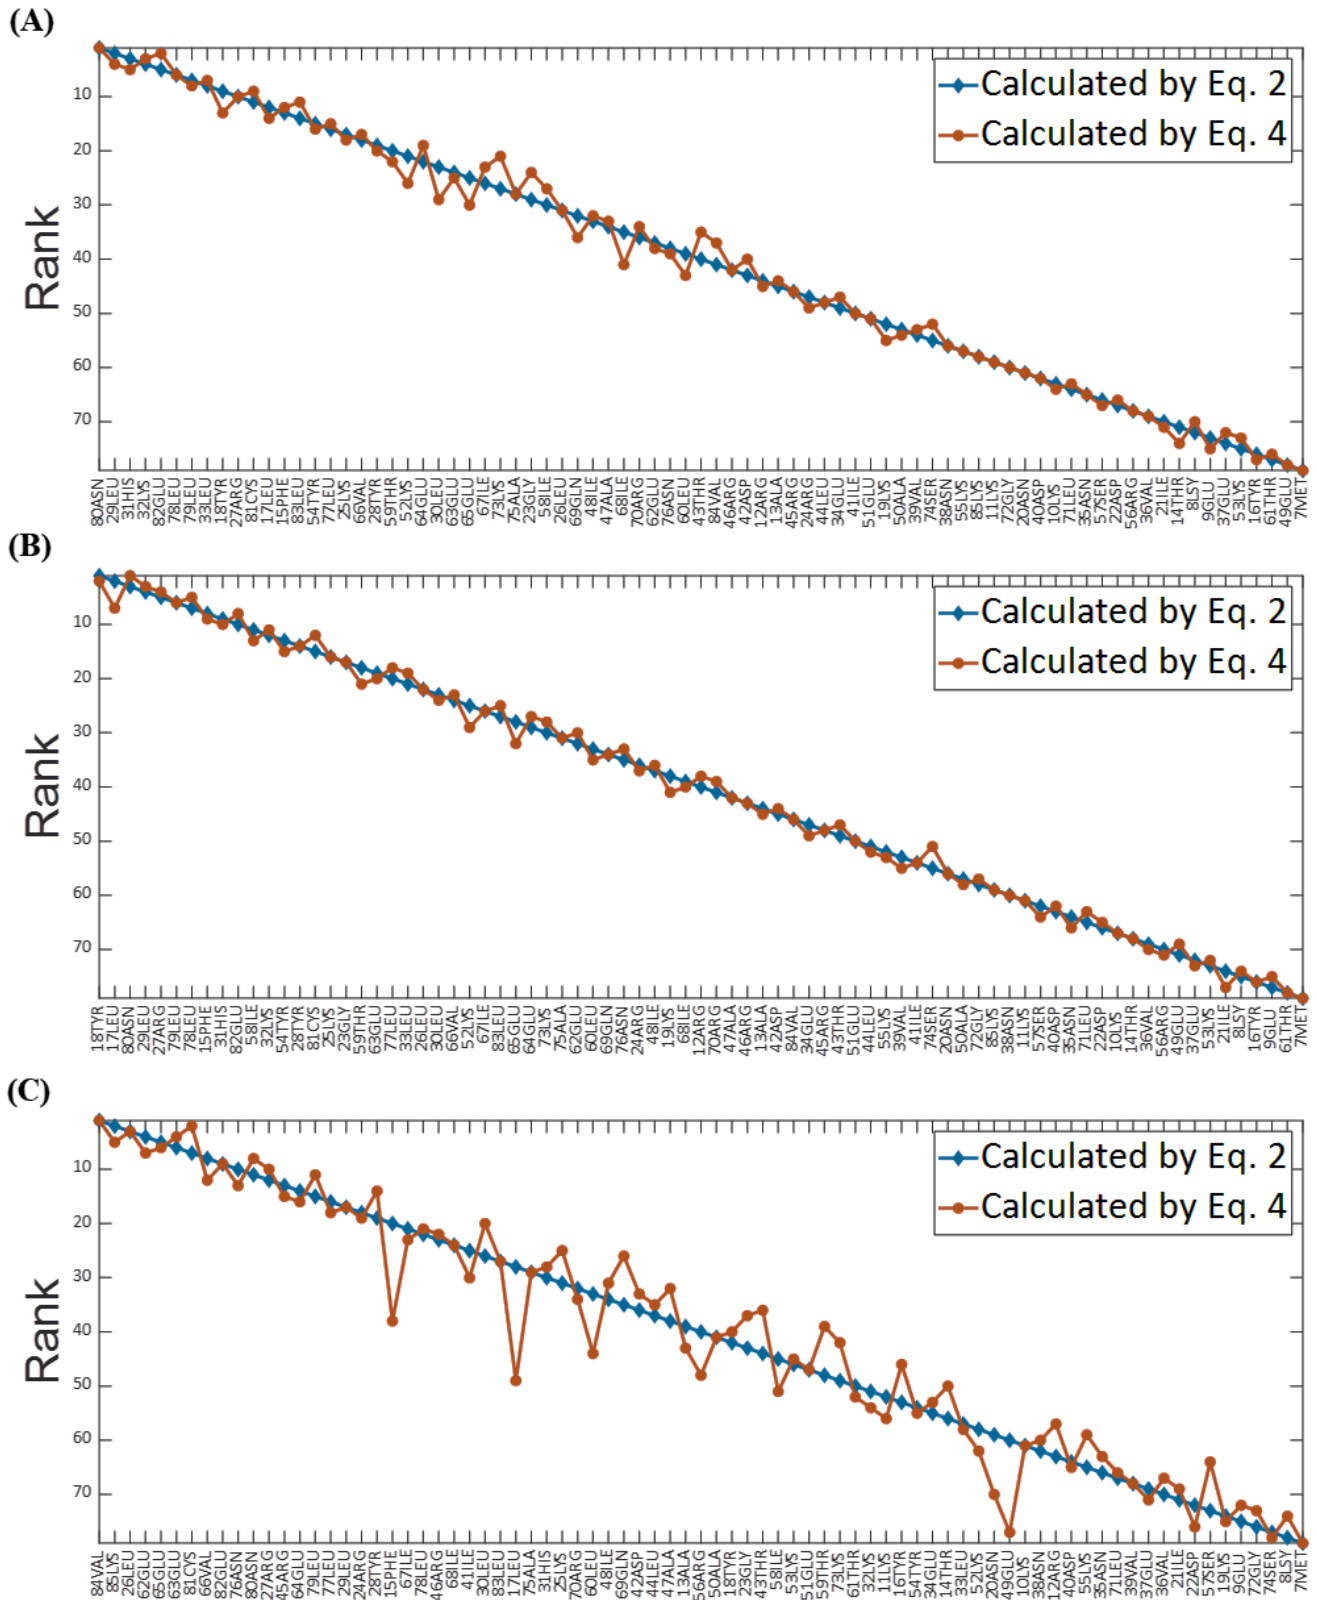

Figure S14: Comparison on the rankings of each residue with correlation coefficients calculated from Eq. 2 and Eq. 4. Panels (A), (B), (C) are for the cases of knotting in coarse-grained "Go"-like model, unknotting in coarse-grained "Go"-like model and unknotting in all-atom model, respectively.

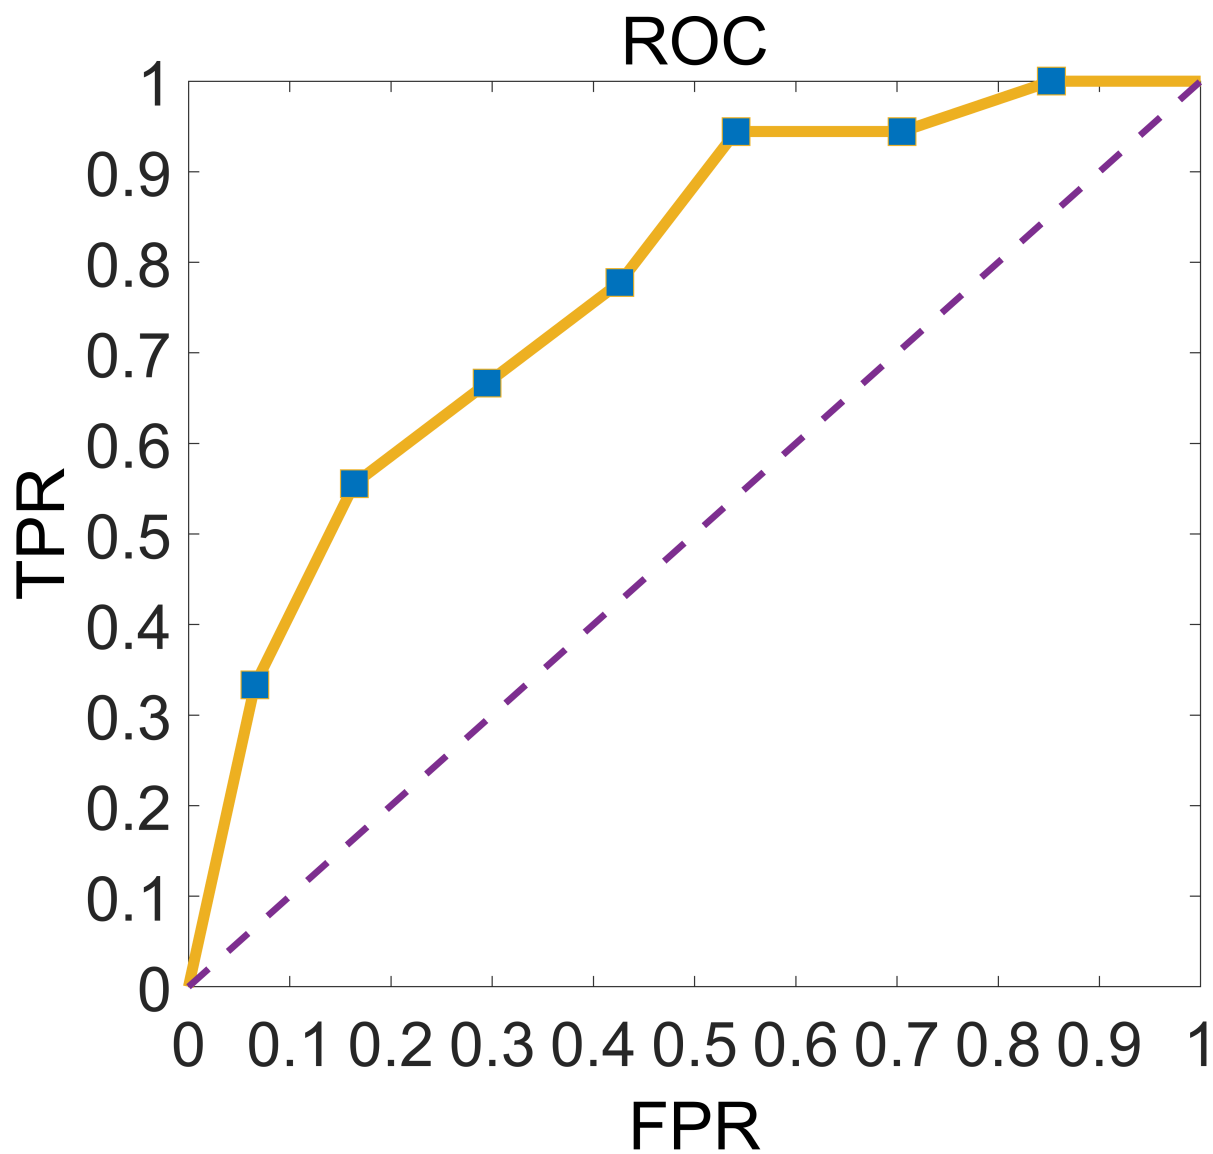

Figure S15: The ROC curve of key residue for knotting according to the predictions from Eq. 4.

Table S1: The ranking of residues according to correlation coefficients between “length of knot tails” and virtual torsional angle  $\tau$  for knotting in coarse-grained “Go”-like model, unknotting in coarse-grained “Go”-like model and unknotting in all-atom model, respectively. The first column represents the index of residues, second to fourth columns represent the ranking for knotting in coarse-grained “Go”-like model, unknotting in coarse-grained “Go”-like model and unknotting in all-atom model, respectively.

| Res ID | Go-fold | Go-unfold | AA-unfold | Res ID | Go-fold | Go-unfold | AA-unfold |
|--------|---------|-----------|-----------|--------|---------|-----------|-----------|
| 7      | 79      | 79        | 79        | 47     | 34      | 42        | 38        |
| 8      | 72      | 75        | 78        | 48     | 33      | 37        | 34        |
| 9      | 73      | 77        | 75        | 49     | 78      | 71        | 60        |
| 10     | 63      | 67        | 61        | 50     | 53      | 57        | 41        |
| 11     | 59      | 61        | 52        | 51     | 51      | 50        | 47        |
| 12     | 44      | 40        | 63        | 52     | 21      | 25        | 58        |
| 13     | 45      | 44        | 39        | 53     | 75      | 73        | 46        |
| 14     | 71      | 68        | 56        | 54     | 15      | 13        | 54        |
| 15     | 13      | 8         | 20        | 55     | 57      | 52        | 65        |
| 16     | 76      | 76        | 53        | 56     | 68      | 70        | 40        |
| 17     | 12      | 2         | 28        | 57     | 66      | 62        | 73        |
| 18     | 9       | 1         | 42        | 58     | 30      | 11        | 45        |
| 19     | 52      | 38        | 74        | 59     | 20      | 18        | 48        |
| 20     | 61      | 56        | 59        | 60     | 39      | 33        | 33        |
| 21     | 70      | 74        | 71        | 61     | 77      | 78        | 50        |
| 22     | 67      | 66        | 72        | 62     | 37      | 32        | 4         |
| 23     | 29      | 17        | 43        | 63     | 24      | 19        | 6         |
| 24     | 47      | 36        | 18        | 64     | 22      | 29        | 14        |
| 25     | 17      | 16        | 31        | 65     | 25      | 28        | 5         |
| 26     | 31      | 22        | 3         | 66     | 18      | 24        | 8         |
| 27     | 10      | 5         | 12        | 67     | 26      | 26        | 21        |
| 28     | 19      | 14        | 19        | 68     | 35      | 39        | 24        |
| 29     | 2       | 4         | 17        | 69     | 32      | 34        | 35        |
| 30     | 23      | 23        | 26        | 70     | 36      | 41        | 32        |
| 31     | 3       | 9         | 30        | 71     | 64      | 65        | 67        |
| 32     | 4       | 12        | 51        | 72     | 60      | 58        | 76        |
| 33     | 8       | 21        | 57        | 73     | 27      | 30        | 49        |
| 34     | 49      | 47        | 55        | 74     | 55      | 55        | 77        |
| 35     | 65      | 64        | 66        | 75     | 28      | 31        | 29        |
| 36     | 69      | 69        | 70        | 76     | 38      | 35        | 10        |
| 37     | 74      | 72        | 69        | 77     | 16      | 20        | 16        |
| 38     | 56      | 60        | 62        | 78     | 6       | 7         | 22        |
| 39     | 54      | 53        | 68        | 79     | 7       | 6         | 15        |
| 40     | 62      | 63        | 64        | 80     | 1       | 3         | 11        |
| 41     | 50      | 54        | 25        | 81     | 11      | 15        | 7         |
| 42     | 43      | 45        | 36        | 82     | 5       | 10        | 9         |
| 43     | 40      | 49        | 44        | 83     | 14      | 27        | 27        |
| 44     | 48      | 51        | 37        | 84     | 41      | 46        | 1         |
| 45     | 46      | 48        | 13        | 85     | 58      | 59        | 2         |
| 46     | 42      | 43        | 23        |        |         |           |           |
